# Supplementary material for: Evaluation of the anti-inflammatory properties of telmesteine on inflammation-associated skin diseases
Source: Royal Society of Chemistry journal article supplement (doi:10.1039/c7ra01111c), 2017-01-01
Supplement: c7ra01111c1.pdf [file c7ra01111c1.pdf]

## Supporting Information

### Evaluation of the anti-inflammatory properties of telmesteine on inflammation-associated skin diseases

Xuetao Xu,<sup>a,b\*</sup> Danying Huang,<sup>a,b</sup> Wenfeng Liu,<sup>a,b</sup> Zhaojun Sheng,<sup>a,b</sup> Kanyi Liang,<sup>c</sup> Dongli Li,<sup>a,b</sup> Denggao Zhao,<sup>a,b</sup>

Yanyan Ma,<sup>a,b</sup> Kun Zhang,<sup>a,b</sup> Tasawar Hayat,<sup>d,e</sup> Njud S. Alharbi <sup>f</sup> and Weikuai Li <sup>g\*</sup>

<sup>a</sup>*School of Chemical and Environment Engineering, Wuyi University, Jiangmen, 529020, China*

<sup>b</sup>*International Healthcare Innovation Institute (Jiangmen), Jiangmen, 529000, China*

<sup>c</sup>*Faculté des Sciences et techniques, Université du Maine Avenue Olivier Messiaen, 72085 Le Mans Cedex 9, France*

<sup>d</sup>*Department of Mathematics, Quaid-I-Azam University, Islamabad 44000, Pakistan*

<sup>e</sup>*NAAM Research Group, King Abdulaziz University, Jeddah, Saudi Arabia*

<sup>f</sup>*Biotechnology Research Group, Department of Biological Sciences, Faculty of Science, King Abdulaziz University, Jeddah, Saudi Arabia*

<sup>g</sup>*Suzhou Pharmpower Topical Research Laboratory Co. Ltd., Suzhou, 215000, China*

### Content

|                                     |    |
|-------------------------------------|----|
| 1. Table 1 (Data for figure 3)..... | S2 |
| 2. Table 2 (Data for figure 5)..... | S2 |
| 3. Table 3 (Data for figure 6)..... | S2 |
| 4. Table 4 (Data for figure 7)..... | S3 |
| 5. Table 5 (Data for figure 8)..... | S3 |

**Table 1 Data for figure 3**

|                            | Control       | TPA            | 5 $\mu$        | 10 $\mu$       | 15 $\mu$      | 20 $\mu$      |
|----------------------------|---------------|----------------|----------------|----------------|---------------|---------------|
| Weight of ear punches (mg) | 6.8 $\pm$ 1.6 | 17.3 $\pm$ 3.2 | 13.1 $\pm$ 2.4 | 10.4 $\pm$ 2.2 | 8.9 $\pm$ 1.6 | 7.8 $\pm$ 1.2 |
| t(vs TPA group)            | 5.083         | -              | 1.819          | 3.078          | 4.067         | 4.815         |
| P(vs TPA group)            | 0.007         | -              | 0.143          | 0.037          | 0.015         | 0.009         |

**Table 2 Data for figure 5**

|                 | Control         | TPA             | 5 $\mu$         | 10 $\mu$        | 15 $\mu$        | 20 $\mu$        |
|-----------------|-----------------|-----------------|-----------------|-----------------|-----------------|-----------------|
| IL-1 $\beta$    | 1.01 $\pm$ 0.42 | 4.48 $\pm$ 0.79 | 3.88 $\pm$ 0.71 | 3.51 $\pm$ 0.52 | 3.29 $\pm$ 0.59 | 2.62 $\pm$ 0.51 |
| t(vs TPA group) | 6.718           | -               | 0.798           | 1.776           | 2.090           | 3.426           |
| P(vs TPA group) | 0.003           | -               | 0.383           | 0.150           | 0.105           | 0.026           |
| IL-6            | 0.51 $\pm$ 0.32 | 3.89 $\pm$ 0.71 | 3.61 $\pm$ 0.79 | 3.42 $\pm$ 0.61 | 2.98 $\pm$ 0.52 | 2.79 $\pm$ 0.51 |
| t(vs TPA group) | 7.517           | -               | 0.457           | 0.870           | 1.791           | 2.179           |
| P(vs TPA group) | 0.002           | -               | 0.672           | 0.434           | 0.148           | 0.095           |
| TNF- $\alpha$   | 0.48 $\pm$ 0.31 | 4.28 $\pm$ 0.70 | 3.81 $\pm$ 0.59 | 3.78 $\pm$ 0.53 | 3.18 $\pm$ 0.53 | 2.71 $\pm$ 0.42 |
| t(vs TPA group) | 8.597           | -               | 0.890           | 0.986           | 2.170           | 3.331           |
| P(vs TPA group) | 0.001           | -               | 0.424           | 0.380           | 0.096           | 0.029           |

**Table 3 Data for figure 6**

|                 | Control         | TPA             | 5 $\mu$         | 10 $\mu$        | 15 $\mu$        | 20 $\mu$        |
|-----------------|-----------------|-----------------|-----------------|-----------------|-----------------|-----------------|
| P65             | 1.37 $\pm$ 0.61 | 6.30 $\pm$ 0.89 | 5.56 $\pm$ 0.61 | 4.86 $\pm$ 0.60 | 4.37 $\pm$ 0.62 | 3.94 $\pm$ 0.51 |
| t(vs TPA group) | 7.914           | -               | 1.188           | 2.324           | 3.082           | 3.985           |
| P(vs TPA group) | 0.001           | -               | 0.301           | 0.081           | 0.037           | 0.016           |
| p-p65           | 1.31 $\pm$ 0.59 | 6.84 $\pm$ 1.20 | 6.09 $\pm$ 0.89 | 5.44 $\pm$ 0.68 | 4.94 $\pm$ 0.60 | 4.37 $\pm$ 0.69 |
| t(vs TPA group) | 7.163           | -               | 0.870           | 1.758           | 2.453           | 3.091           |
| P(vs TPA group) | 0.002           | -               | 0.433           | 0.157           | 0.070           | 0.037           |

**Table 4 Data for figure 7**

|                          | Control         | TPA             | 5 $\mu$         | 10 $\mu$        | 15 $\mu$        | 20 $\mu$        |
|--------------------------|-----------------|-----------------|-----------------|-----------------|-----------------|-----------------|
| I $\kappa$ B $\alpha$    | 4.33 $\pm$ 0.71 | 0.58 $\pm$ 0.38 | 1.20 $\pm$ 0.41 | 2.16 $\pm$ 0.51 | 2.89 $\pm$ 0.60 | 3.35 $\pm$ 0.69 |
| t(vs TPA group)          | 8.066           | -               | 1.921           | 4.303           | 5.634           | 6.091           |
| P(vs TPA group)          | 0.001           | -               | 0.127           | 0.013           | 0.005           | 0.004           |
| p- I $\kappa$ B $\alpha$ | 0.70 $\pm$ 0.30 | 4.59 $\pm$ 0.90 | 3.91 $\pm$ 0.61 | 3.50 $\pm$ 0.69 | 3.12 $\pm$ 0.59 | 2.72 $\pm$ 0.51 |
| t(vs TPA group)          | 7.102           | -               | 1.083           | 1.665           | 2.366           | 3.131           |
| P(vs TPA group)          | 0.002           | -               | 0.340           | 0.171           | 0.077           | 0.035           |
| IKK                      | 0.59 $\pm$ 0.38 | 4.41 $\pm$ 0.92 | 4.10 $\pm$ 0.71 | 3.82 $\pm$ 0.60 | 3.19 $\pm$ 0.51 | 2.80 $\pm$ 0.57 |
| t(vs TPA group)          | 6.647           | -               | 0.462           | 0.930           | 2.009           | 2.577           |
| P(vs TPA group)          | 0.003           | -               | 0.668           | 0.405           | 0.115           | 0.062           |

**Table 5 Data for figure 8**

|                 | Control         | TPA             | 5 $\mu$         | 10 $\mu$        | 15 $\mu$        | 20 $\mu$        |
|-----------------|-----------------|-----------------|-----------------|-----------------|-----------------|-----------------|
| Atk             | 0.61 $\pm$ 0.31 | 3.49 $\pm$ 0.72 | 3.08 $\pm$ 0.59 | 2.79 $\pm$ 0.51 | 2.40 $\pm$ 0.59 | 1.89 $\pm$ 0.51 |
| t(vs TPA group) | 6.363           | -               | 0.763           | 1.374           | 2.028           | 3.141           |
| P(vs TPA group) | 0.003           | -               | 0.488           | 0.241           | 0.112           | 0.035           |
| p-Atk           | 0.90 $\pm$ 0.42 | 4.11 $\pm$ 0.82 | 3.32 $\pm$ 0.64 | 3.05 $\pm$ 0.61 | 2.48 $\pm$ 0.59 | 2.08 $\pm$ 0.49 |
| t(vs TPA group) | 6.035           | -               | 1.315           | 1.796           | 2.795           | 3.681           |
| P(vs TPA group) | 0.004           | -               | 0.259           | 0.147           | 0.049           | 0.021           |
| p85             | 0.61 $\pm$ 0.40 | 3.69 $\pm$ 0.88 | 3.37 $\pm$ 0.79 | 2.98 $\pm$ 0.68 | 2.47 $\pm$ 0.39 | 1.79 $\pm$ 0.61 |
| t(vs TPA group) | 5.519           | -               | 0.469           | 1.106           | 2.195           | 3.073           |
| P(vs TPA group) | 0.005           | -               | 0.664           | 0.331           | 0.093           | 0.037           |
| p-p85           | 0.49 $\pm$ 0.38 | 3.59 $\pm$ 0.81 | 3.29 $\pm$ 0.71 | 3.09 $\pm$ 0.59 | 2.58 $\pm$ 0.49 | 2.31 $\pm$ 0.51 |
| t(vs TPA group) | 6.001           | -               | 0.482           | 0.864           | 1.848           | 2.316           |
| P(vs TPA group) | 0.004           | -               | 0.655           | 0.436           | 0.138           | 0.081           |
